# Supplementary material for: Graphene oxide antagonizes the toxic response to arsenicviaactivation of protective autophagy and suppression of the arsenic-binding protein LEC-1 inCaenorhabditis elegans
Source: Royal Society of Chemistry journal article supplement (doi:10.1039/c8en00244d), 2018-01-01
Supplement: c8en00244d1.pdf [file c8en00244d1.pdf]

## Supporting Information

### **Graphene Oxide Antagonize Toxic Response to Arsenic via Activation of Protective Autophagy and Suppression of Arsenic- Binding Protein LEC-1 in *Caenorhabditis elegans***

Hui Dai<sup>1,2</sup>, Yun Liu<sup>1</sup>, Jingjing Wang<sup>1,2</sup>, Yaguang Nie<sup>1</sup>, Yuxiang Sun<sup>1</sup>, Mudi Wang<sup>1,2</sup>,  
Dayan Wang<sup>1,2</sup>, Zhen Yang<sup>1,2</sup>, Lei Cheng<sup>1,2</sup>, Juan Wang<sup>1,2</sup>, Jian Weng<sup>5</sup>,  
Qiuquan Wang<sup>4</sup>, Fangyue Wang<sup>6</sup>, Lijun Wu<sup>1,2,3</sup>, Guoping Zhao<sup>1</sup>, and An Xu<sup>\*,1,2,3</sup>

<sup>1</sup>Key Laboratory of High Magnetic Field and Ion Beam Physical Biology, Chinese Academy of Sciences; Anhui Province Key Laboratory of Environmental Toxicology and Pollution Control Technology, Hefei Institutes of Physical Science, Anhui 230031, P. R. China

<sup>2</sup>University of Science and Technology of China, Hefei, Anhui 230026, P. R. China

<sup>3</sup>Institutes of Physical Science and Information Technology, An Hui University, Hefei, Anhui, 230601, P. R. China

<sup>4</sup>Department of Chemistry, College of Chemistry and Chemical Engineering, Xiamen University, Xiamen 361005, P. R. China

<sup>5</sup>Research Center of Biomedical Engineering, Department of Biomaterials, College of Materials, Xiamen University, Xiamen 361005, P. R. China

<sup>6</sup>Ore Deposit and Exploration Centre, School of Resources and Environmental Engineering, Hefei University of Technology, Hefei, 230009, P. R. China

Corresponding authors: An Xu. Tel: +8655165593336; E-mail: [anxu@ipp.ac.cn](mailto:anxu@ipp.ac.cn)



## SUPPLEMENTARY FIGURE AND FIGURE LEGEND

**Supplementary Table 1. PCR primers for qRT-PCR**

| Primer        | Sequence (5'-3')                                                     |
|---------------|----------------------------------------------------------------------|
| <i>bec-1</i>  | CAACTGCAAGAATCGACGAA<br>CCCATCTGATGCTCCAGTTT                         |
| <i>lgg-1</i>  | TGACATTTTCAGACGATGACAAC<br>TGTTATCGAATCGGTCAATCTCT                   |
| <i>unc-51</i> | CAGTCTAGATCTGTGATTTGAAGCCCCAAAAC<br>CTATGAGGTACCTGCTTAACCGGACTGGATTC |
| <i>atg-7</i>  | CATCTCTCGGAGCCGATCAC<br>GCAAGAACGTTGCGAACCAT                         |
| <i>lec-1</i>  | TCCTCAATTCCTTCGCTGGT<br>GCGGTCTTCGAGTGAAGGTT                         |
| <i>act-1</i>  | ACGAGGTTGCCGCTCTTGTTG<br>CATACCGACCATGACTCCTTGATGAC                  |

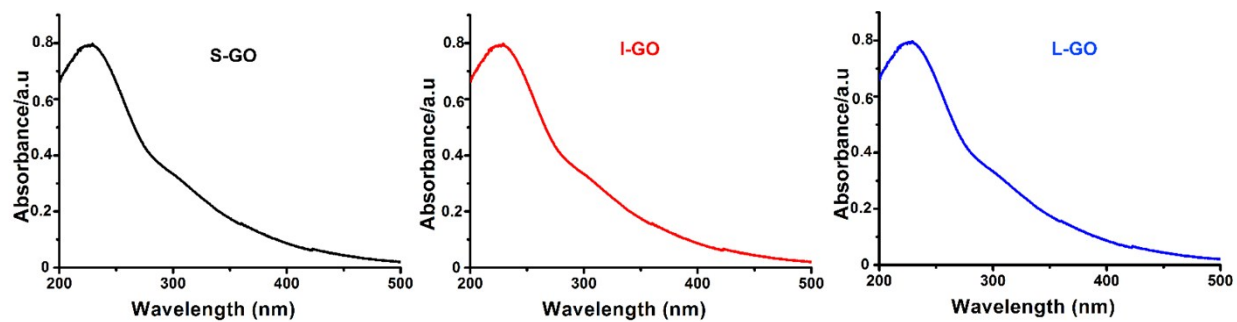

**Fig. S1** UV-vis absorption spectrum of S-GO, I-GO and L-GO in Milli-Q

water at 10  $\mu\text{g/mL}$ .

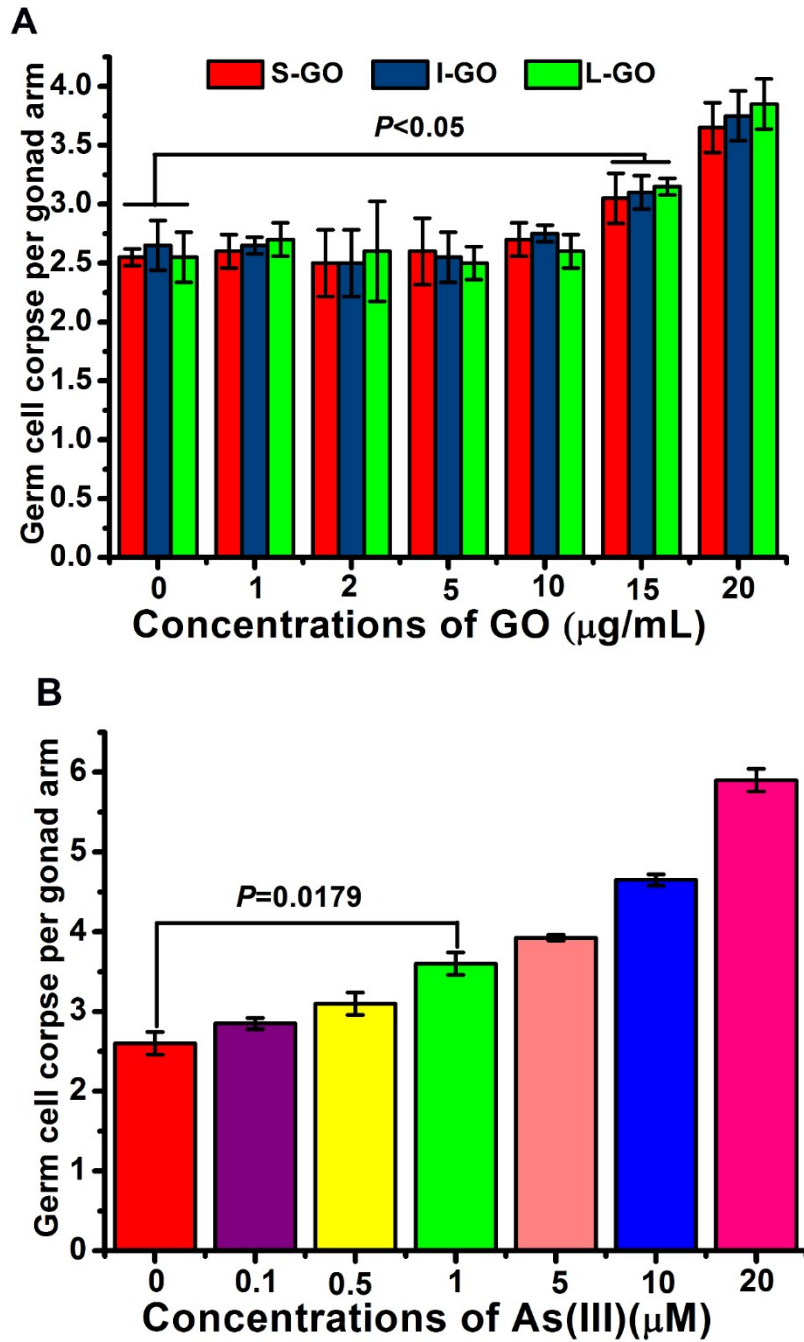

**Fig. S2** Average number of S-GO, I-GO, L-GO and As(III)-induced germline apoptotic cells. (A) *C. elegans* were treated with graded doses of S-GO, I-GO, and L-GO for 24 h, and the toxicity was detected as germ cell corpse per gonad arm. (B) *C. elegans* were treated with graded doses of As(III) for 24 h, and the toxicity was detected as germ cell corpse per gonad arm ( $n=3$ ).

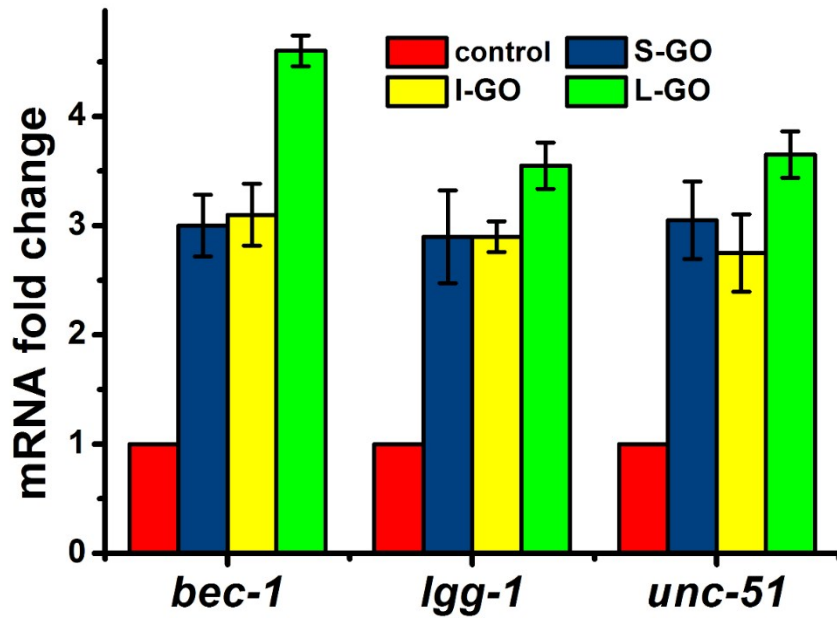

**Fig. S3** Gene expressions levels in wild type nematodes following GO treatment. Relative expression of *bec-1*, *lgg-1*, *unc-51* after exposure to 10  $\mu\text{g}/\text{mL}$  S-GO, I-GO and L-GO for 24 h. Gene expressions levels were determined using qRT-PCR assay ( $n=3$ ).

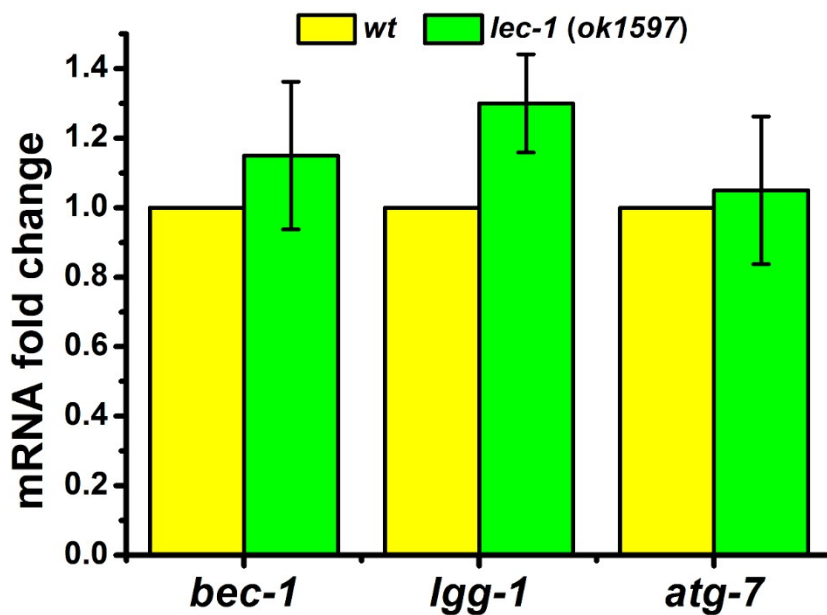

**Fig. S4** Relative expression level of autophagy response genes in wild type and *lec-1 (ok1597)* nematodes following GO exposure, and wild type and *lec-1 (ok1597)* nematodes after exposure to 10 µg/mL L-GO for 24 h. *bec-1*, *lgg-1*, *atg-7* expressions levels were measured using qRT-PCR analysis ( $n=3$ ).
